# Supplementary material for: Three-dimensional thermal network structured GnPs&MWCNTs@PBO/PEEK composites integrating high thermal conductivity and electromagnetic shielding
Source: Royal Society of Chemistry journal article supplement (doi:10.1039/d4ta03002h), 2024-01-01
Supplement: d4ta03002h1.pdf [file d4ta03002h1.pdf]

1 ***Supporting Information***

2 **Three-dimensionally filler thermal network structured GnP&MWCNTs@PBO/PEEK**  
3 **composites integrating high thermal conductivity and electromagnetically shielding**

4 *Yageng Bai*<sup>a</sup>, *Hongxia Qian*<sup>b</sup>, *Xueling Cao*<sup>c</sup>, *Fengyu Wen*<sup>a</sup>, *Yashu He*<sup>a</sup>, *Jierun Ma*<sup>a</sup>, *Lin Cheng*<sup>a</sup>,

5 *Yifan Wang*<sup>a</sup>, *Haoyuan Tan*<sup>a</sup>, *Yuxuan Gu*<sup>a</sup>, *Pengbo Lian*<sup>a</sup>, *Rui Chen*<sup>d,\*</sup>, *Jianxin Mu*<sup>a,\*</sup>

6

7 <sup>a</sup> *Key Laboratory of High Performance Plastics, Ministry of Education, National & Local Joint*

8 *Engineering Laboratory for Synthesis Technology of High Performance Polymer, College of*

9 *Chemistry, Jilin University, Changchun 130012, P. R. China*

10

11 <sup>b</sup> *Siping Experimental Middle School, Siping 136000, P. R. China*

12

13 <sup>c</sup> *College of Science, Qiongtai Normal University, Haikou 571100, P. R. China*

14

15 <sup>d</sup> *Light Industry and Chemical Engineering, Guangdong University of Technology, Canton 510006, P.*

16 *R. China*

17 \* Corresponding author:

18 Prof. Jianxin Mu

19 E-mail: Jianxin\_mu@jlu.edu.cn

20 Dr. Rui Chen

21 E-mail: jrchen1136@163.com

---

1 **Table of Contents**

2 **Fig. S1** (a, b) GnPs&MWCNTs@PBO composites with two filler contents; (c) and (d) represent the  
3 local enlarged images of (b); (e, f) SEM images of the cryo-fractured surface of  
4 GnPs&MWCNTs@PBO/PEEK composites.

5 **Table S1** TC values of the composites prepared by using various proportions of the fillers (with a total  
6 filler content of 19.31 vol%).

7 **Fig. S2** The Foygel model-based (a, b)  $V_c$  (through and in-planes) fitting curves of randomly mixed  
8 GnPs&MWCNTs@PBO/PEEK composites.

9 **Table S2** Parameters related to  $R_c$  fitting.

10 **Fig. S3** Comparison of the TC values of GnPs&MWCNTs@PBO/PEEK composites and previously  
11 reported filled polymeric composites.

12 **Fig. S4** Infrared thermal images of the contrast samples at various heating durations.

13 **Simulation part**

14 **Fig. S5** (a) The thermal conductivity data of GnPs&MWCNTs@PBO/PEEK composites with  
15 different PBO concentrations; (b) Comparison of thermal conductivity of three composites at 19.31  
16 vol% filler content.

17 **Equation part**

18 **Table S3** Thermal characteristics of GnPs&MWCNTs@PBO/PEEK composites.

19 **References**

---

1

2 **Results and discussion supplementary**

3 SEM images in **Fig. S1(a, b)** depicts the surface of GnPs&MWCNTs@PBO  
4 composites with two filler contents. During the formation of the thermally conductive  
5 network in the GnPs&MWCNTs@PBO composites, the PBO fiber balls is believed to  
6 play a role in "volume exclusion". This effectively increases the local concentration of  
7 carbon nanofillers in the microscopic regions, creating more pathways for heat  
8 conduction. In addition, the dense stacking structure of the carbon nanofillers  
9 significantly enhances the interfacial interactions between the nanofillers, directly  
10 reducing the interfacial thermal resistance and improving phonon transport. Additionally,  
11 **Fig. S1(c, d)** illustrates the formation of a continuous thermally conductive network  
12 structure by the deposition of carbon nanofillers on the surface of PBO fiber balls. The  
13 strong interfacial interaction between carbon nanofillers and PBO fiber balls promotes  
14 uniform filler deposition through  $\pi$ - $\pi$  stacking. The inclusion of PBO increases the contact  
15 area between different carbon nanomaterials, thereby enhancing the number of pathways  
16 for thermal conduction. **Fig. S1(e, f)** shows SEM images of the cryo-fractured surfaces  
17 of GnPs&MWCNTs@PBO/PEEK composites with a filler content of 19.31 vol%. The  
18 blue dashed lines depict the tendency of MWCNTs to align vertically. It is evident that,  
19 while a small fraction of MWCNTs may align horizontally due to hot-pressing pressure,  
20 the majority of these 1D structures prefer vertical alignment, forming continuous  
21 pathways for thermal conduction. This alignment significantly enhances the through-  
22 plane thermal conductivity of GnPs&MWCNTs@PBO/PEEK composites.

23

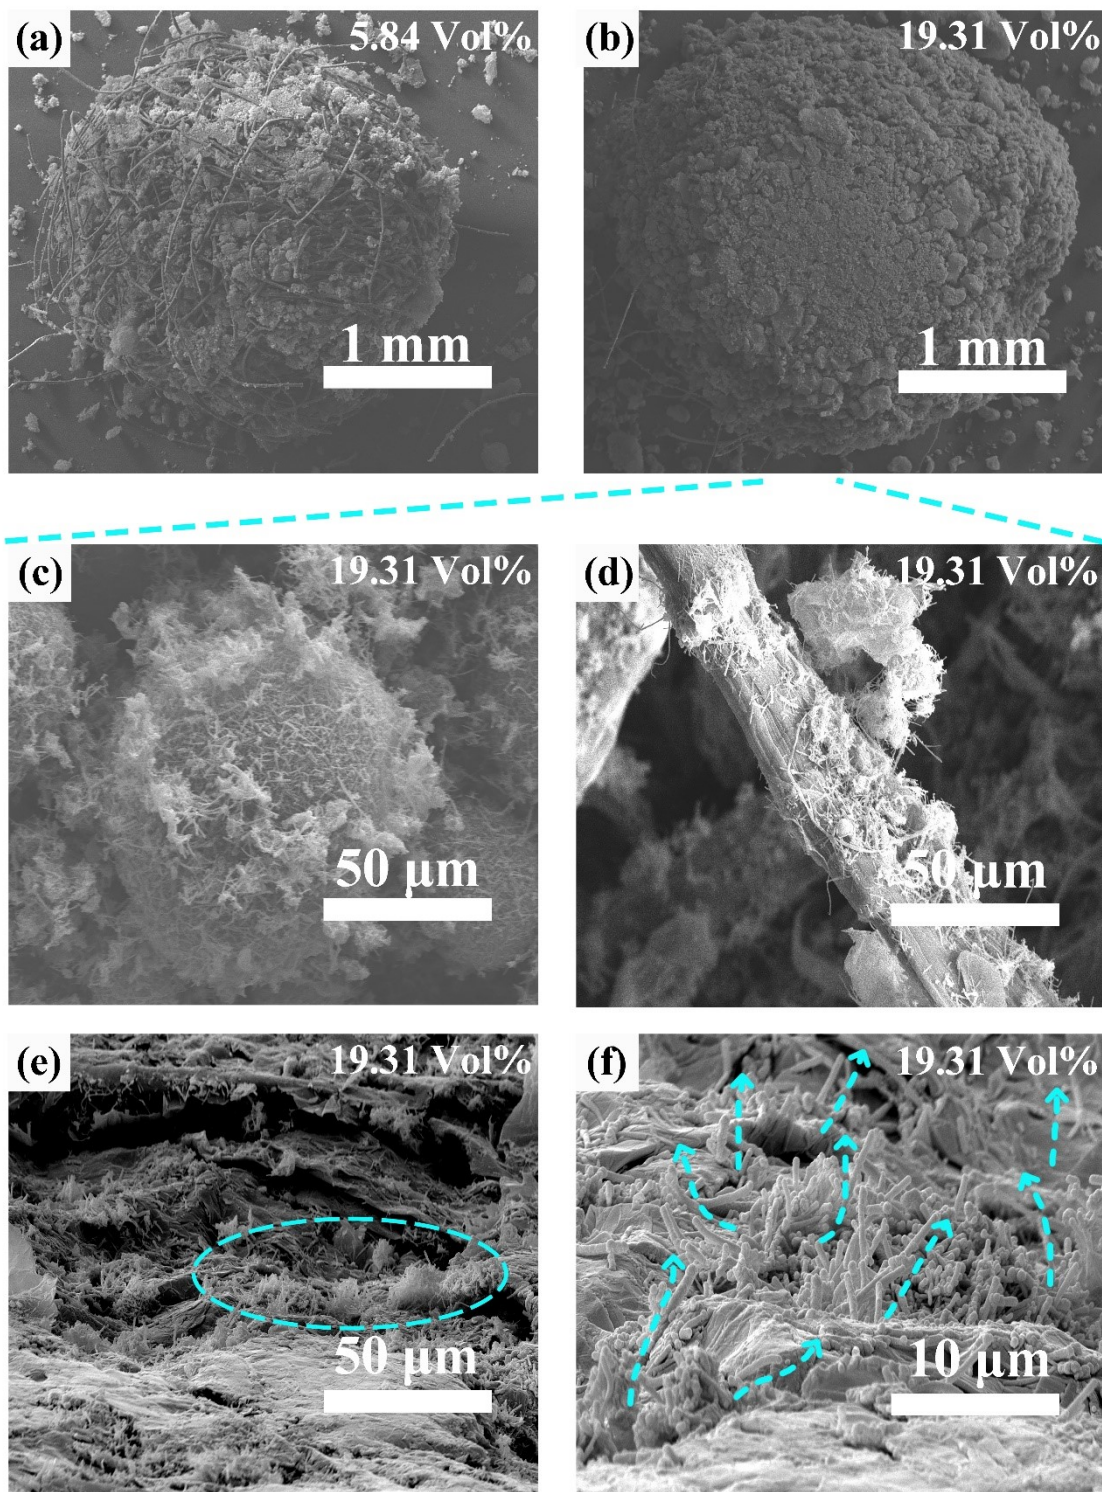

1

2 **Fig. S1** (a, b) GnP&MWCNTs@PBO composites with two filler contents; (c) and (d) represent the  
 3 local enlarged images of (b); (e, f) SEM images of the cryo-fractured surface of  
 4 GnP&MWCNTs@PBO/PEEK composites.

1 Composites containing two or multiple fillers often exhibit a synergistic  
 2 enhancement in thermal conductivity. At a microscopic level, the “nano-microbridge”  
 3 effect created by varied fillers results in the formation of numerous crossing points or  
 4 contact lines, increasing the contact area of the fillers while simultaneously reducing the  
 5 contact area of the polymer-fillers. This reduction in interface thermal resistance  
 6 significantly enhances heat transfer efficiency. Thus, to attain an optimal ratio of GnPs  
 7 and MWCNTs in the composites, the GnPs&MWCNTs@PBO/PEEK composites were  
 8 fabricated using various ratios of carbon fillers, followed by the comparison of their  
 9 thermal conductivity. As indicated in **Table S1**, composites with a filler ratio of 7:3 (GnPs  
 10 : MWCNTs) demonstrated optimal thermal conductivity within the specified physical  
 11 parameters of the fillers. Therefore, this specific ratio was selected for the subsequent  
 12 experiments.

13

14 **Table S1** TC values of the composites prepared by using various proportions of the fillers (with a total  
 15 filler content of 19.31 vol%).

| Ratio of (GnPs and<br>MWCNTs) | TC-Through Plane ( $W \cdot m^{-1} K^{-1}$ ) | TC-In Plane ( $W \cdot m^{-1} K^{-1}$ )<br>1) |
|-------------------------------|----------------------------------------------|-----------------------------------------------|
| 8 : 2                         | 2.69                                         | 20.25                                         |
| 7 : 3                         | 3.19                                         | 22.17                                         |
| 6 : 4                         | 2.84                                         | 19.63                                         |
| 5 : 5                         | 2.58                                         | 16.34                                         |

16

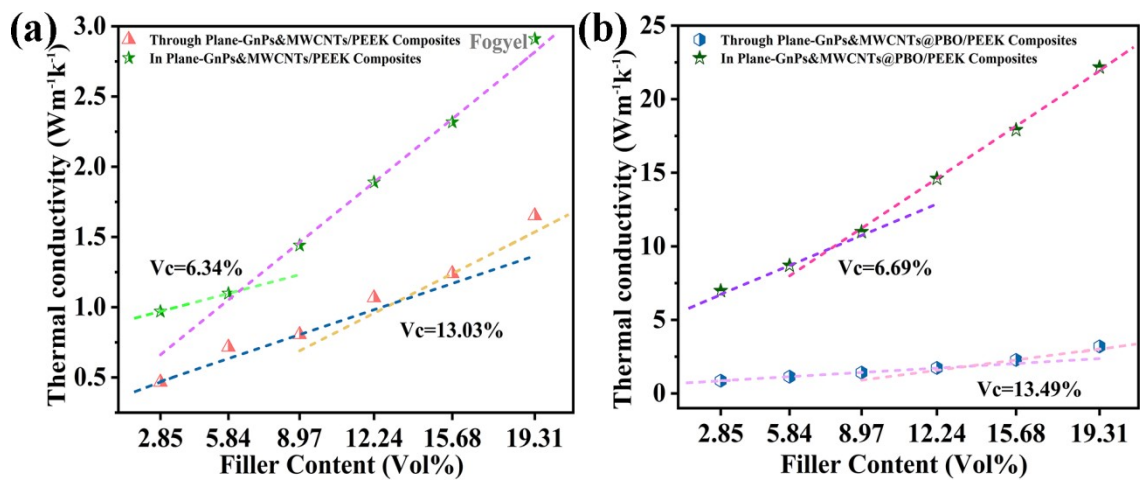

1

2 **Fig. S2** (a, b) Foygel model-based  $V_c$  (through and in-planes) fitting curves of  
 3 GnP&MWCNTs@PBO/PEEK and randomly blended control composites.

4

---

1 **Table S2** Parameters related to Rc fitting.

| Sample                                 | V <sub>c</sub> (Vol%) | β    | K <sub>0</sub> | R <sub>c</sub> (KW <sup>-1</sup> ) | R <sub>it</sub> (m <sup>2</sup> ·WK <sup>-1</sup> ) |
|----------------------------------------|-----------------------|------|----------------|------------------------------------|-----------------------------------------------------|
| In plane-GnPs&MWCNTs@PBO/PEEK          | 6.69                  | 0.47 | 47.0           | 7.94×10 <sup>3</sup>               | 4.58×10 <sup>-8</sup>                               |
| Through plane-<br>GnPs&MWCNTs@PBO/PEEK | 13.49                 | 0.37 | 8.2            | 1.74×10 <sup>4</sup>               | 2.09×10 <sup>-8</sup>                               |
| In plane-GnPs&MWCNTs/PEEK              | 6.34                  | 0.39 | 4.0            | 6.06×10 <sup>4</sup>               | 1.63×10 <sup>-6</sup>                               |
| Through plane-GnPs&MWCNTs/PEEK         | 13.03                 | 0.48 | 6.6            | 6.16×10 <sup>4</sup>               | 1.60×10 <sup>-6</sup>                               |

2

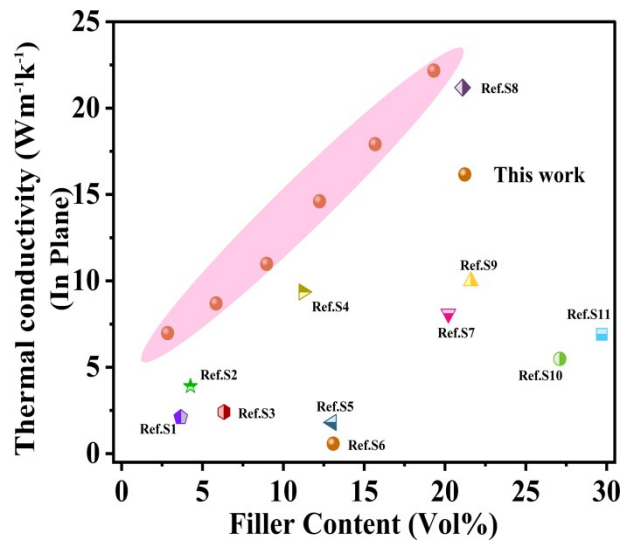

1

2 **Fig. S3** Comparison of the TC values of GnPs&MWCNTs@PBO/PEEK composites and previously  
3 reported filled polymeric composites [1-11].

4



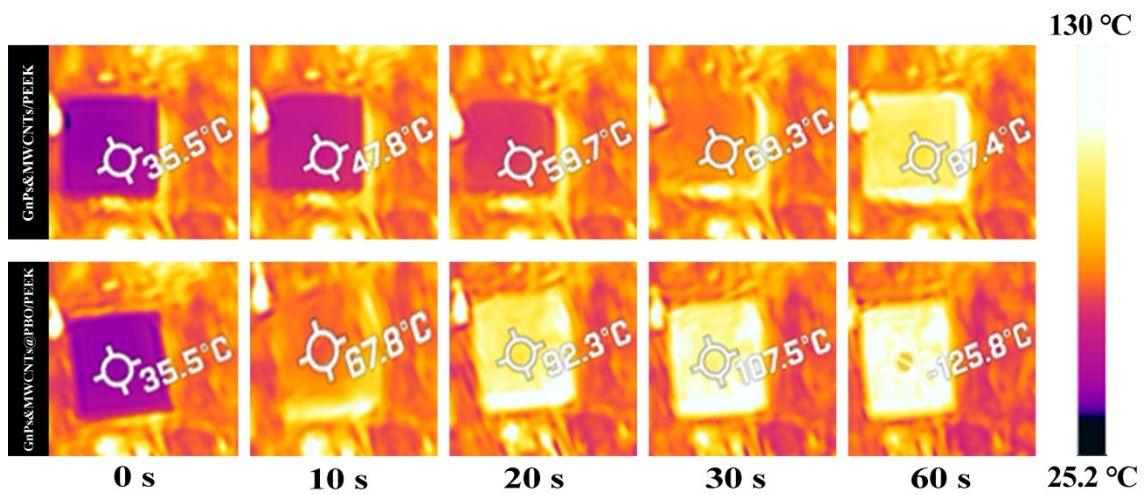

1

2 Fig. S4 Infrared thermal images of the contrast samples at various heating durations.

3

---

## 1 Simulation part

2 A 3D solid heat transfer model with a size of 1 mm × 1 mm × 1 mm was employed  
3 to facilitate the computational process. The GnPs&MWCNTs/PEEK and  
4 GnPs&MWCNTs@PBO/PEEK composites were determined to have respective in-plane  
5 thermal conductivities of 2.91 W·m<sup>-1</sup>K<sup>-1</sup> and 22.17 W·m<sup>-1</sup>K<sup>-1</sup>. A boundary heat source of  
6 100 °C was applied to the left side of the model using the solid heat transfer module. All  
7 other external boundaries were set as heat-insulated, with an initial temperature of 20 °C.  
8

1 The concentration of PBO used for modification significantly influences the thermal  
 2 conductivity of the PEEK matrices, as shown in Fig. S5. The results show a marked  
 3 enhancement in the thermal conductivity of PBO@PEEK composites compared to pure  
 4 PEEK. As shown in Fig. S5, the composites attained optimal thermal conductivity at a  
 5 filler ratio of 7:3 (PBO: PEEK), aligning with the specific physical parameters of the  
 6 fillers. The corresponding PBO to PEEK ratio was chosen for further experiments. As  
 7 illustrated in **Fig. S5b**, the thermal conductivity of GnPs&MWCNTs@PBO/PEEK  
 8 composites is demonstrably higher than that of GnPs/MWCNTs@PBO/PEEK  
 9 composites at a filler content of 19.31 vol%. Bridging 1D MWCNTs with 2D GnPs can  
 10 significantly enhance the through-plane thermal conductivity of nanocomposites. The  
 11 approach effectively enhances the interfacial contact area between fillers, thereby  
 12 significantly improving the overall thermal conductivity of  
 13 GnPs&MWCNTs@PBO/PEEK composites.

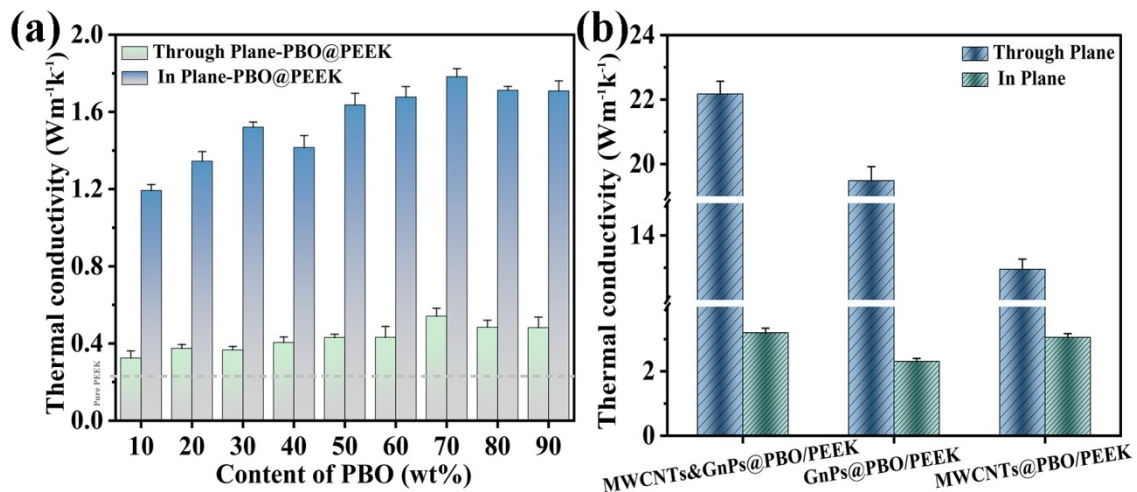

14  
 15 **Fig. S5** (a) Thermal conductivity data of GnPs&MWCNTs@PBO/PEEK composites with different  
 16 PBO concentrations; (b) Comparison of thermal conductivity of three composites at a filler content of  
 17 19.31 vol%.

---

**1 Equation part**

2        The conductive percolation threshold of the composites was simulated according to  
3 the classical Kirkpatrick-Zallen **Eq. (S1)**, where  $\sigma$  and  $\sigma_f$  denote the conductivities of the  
4 composites and fillers, respectively;  $t$  denotes the number of dimensions associated with  
5 the conductive network within the composites; and  $\Phi$  and  $\Phi_C$  represent the total volume  
6 fraction and critical volume fraction of the fillers for electrical percolation.

7                                 $\log \sigma = \log \sigma_f + t \log \left( \frac{\Phi - \Phi_c}{1 - \Phi_c} \right)$  .....(S1)

8

1 **Table S3** Thermal characteristics of GnP&MWCNTs@PBO/PEEK composites.

| Samples    | Weight loss temperature(°C) |          | $T_{HRI}^*(^{\circ}C)$ |
|------------|-----------------------------|----------|------------------------|
|            | $T_5$                       | $T_{30}$ |                        |
| PEEK       | 562                         | 589      | 283                    |
| 2.85 Vol%  | 597                         | 743      | 335                    |
| 5.84 Vol%  | 595                         | 753      | 338                    |
| 8.97 Vol%  | 590                         | 774      | 343                    |
| 12.24 Vol% | 596                         | 781      | 346                    |
| 15.68 Vol% | 586                         | 793      | 348                    |
| 19.31 Vol% | 589                         |          |                        |

2

3 "Heat-resistance index ( $T_{HRI}$ )" is an effective parameter to assess the thermal stability  
 4 of the composites. Heat-resistance index ( $T_{HRI}$ ) was computed using the **Eq. (S2)**:

5 
$$T_{HRI} = 0.49 * [T_5 + 0.6 * (T_{30} - T_5)] \dots\dots\dots(S2)$$

6 Where,  $T_5$  and  $T_{30}$  were the decomposition temperature corresponding to 5% and  
 7 30% weight loss, respectively.

8

---

## 1 Reference

- 2 [1] Y. Shang, D. Zhang, M. An and Z. Li, *Materials*, 2022, **15**, 5380-5392.
- 3 [2] J. Gao, G. Han, J. Song, C. He, J. Hu, W. Wang, Y. Feng and C. Liu, *Mater. Today Phys.*, 2022, **27**,  
4 100811-100821.
- 5 [3] Z. Jiang, B. Jiang, B. Yang, X. Liu, Y. Yang, C. Zhang, Y. Shang and H. Zhang, *Adv. Mater. Interfaces*,  
6 2023, **10**, 2202508-2202518.
- 7 [4] T. Gu, D. Sun, X. Xie, X. Qi, J. Yang, C. Zhao, Y. Lei and Y. Wang, *Compos. Sci. Technol.*, 2022,  
8 **230**, 109757-109769.
- 9 [5] S. Chauhan, P. N. Mohan, K. C. J. Raju, S. Ghotia, N. Dwivedi, C. Dhand, S. Singh and P. Kumar,  
10 *Colloids Surf. A*, 2023, **673**, 131811-131820.
- 11 [6] C. Zhang, K. Deng, X. Li, K. Fu and C. Ni, *ACS Appl. Nano Mater.*, 2023 **6**, 13400-13408.
- 12 [7] J.-U. Jang, H. E. Nam, S. O. So, H. Lee, G. S. Kim, S. Y. Kim and S. H. Kim, *Polymers*, 2022, **14**,  
13 323-333.
- 14 [8] Z. Ali, X. Kong, M. Li, X. Hou, L. Li, Y. Qin, G. Song, X. Wei, S. Zhao, T. Cai, W. Dai, C. Lin, N.  
15 Jiang and J. Yu, *Fibers Polym.*, 2021, **23**, 463-470.
- 16 [9] X. Wang, H. Lu, C. Feng, H. Ni and J. Chen, *Plast., Rubber Compos.*, 2020, **49**, 196-203.
- 17 [10] Y. Sun, M. Zhang, Y. Zhang, J. Luan, H. Dang, D. Jiang and Y. Yang, *Compos. Commun.*, 2021, **28**,  
18 100909-100915.
- 19 [11] S. Yang, Z. Jin, C. Song, Z. Pu and B. Wen, *J. Mater. Sci.*, 2022, **57**, 1084-1097.
- 20
